# Supplementary material for: Assembly of {Co14} nanoclusters from adenine-modified Co4-thiacalix[4]arene units
Source: Royal Society of Chemistry journal article supplement (doi:10.1039/d1ce00440a), 2021-01-01
Supplement: d1ce00440a1.pdf [file d1ce00440a1.pdf]

## Assembly of $\{Co_{14}\}$ nanoclusters from adenine-modified $Co_4$ -thiacalix[4]arene units

Yanan Yu,<sup>a</sup> Zhao Wang,<sup>a</sup> Ziping Li,<sup>a</sup> Xinxin Hang,<sup>\*a,b</sup> and Yanfeng Bi<sup>\*a</sup>

<sup>a</sup>*School of Petrochemical Engineering, Liaoning Petrochemical University, Fushun 113001, P. R. China. E-mail: biyanfeng@lnpu.edu.cn*

<sup>b</sup>*School of Chemistry and Chemical Engineering, Institute for Innovative Materials and Energy Yangzhou University, Yangzhou, Jiangsu 225002, P. R. China. E-Email: hangxinxin@yzu.edu.cn*

### Additional figures

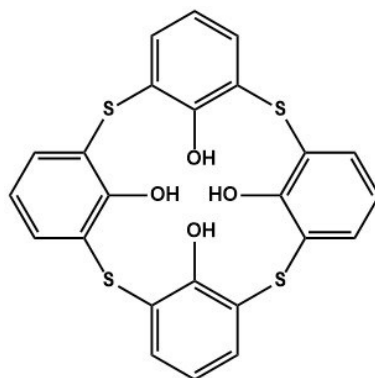

**Figure S1.** The structure of H<sub>4</sub>T4A.

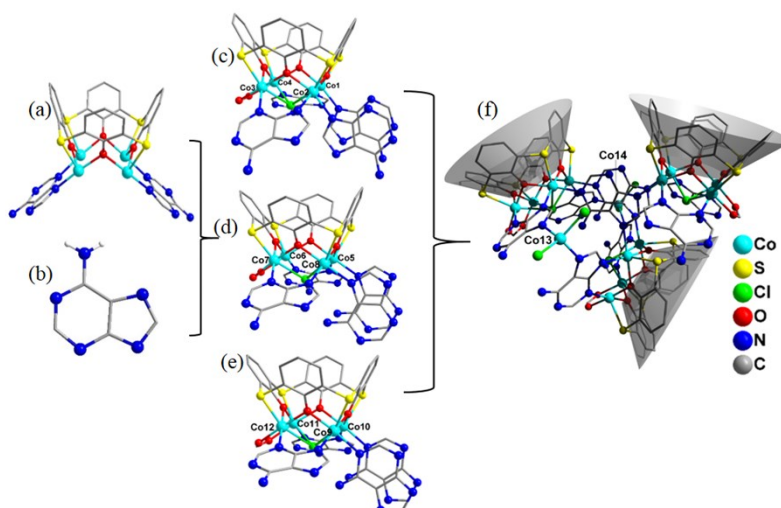

**Figure S2.** The assembly of  $Co_{14}\alpha$ : (a) the adenine-functionalized  $Co_4$ -T4A secondary building unit (SBU); (b) adenine ligand; (c), (d), (e) the asymmetric units; (f) the crystal structure of  $Co_{14}\alpha$ .

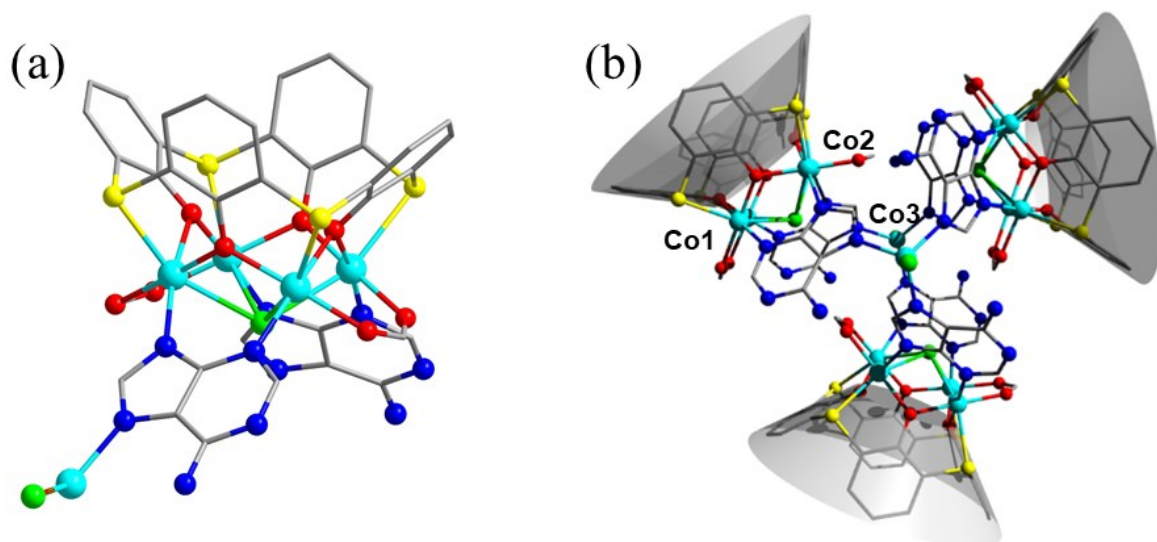

**Figure S3.** (a) The asymmetric unit of and (b) the crystal structure of  $\text{Co}_{14}\beta$ .

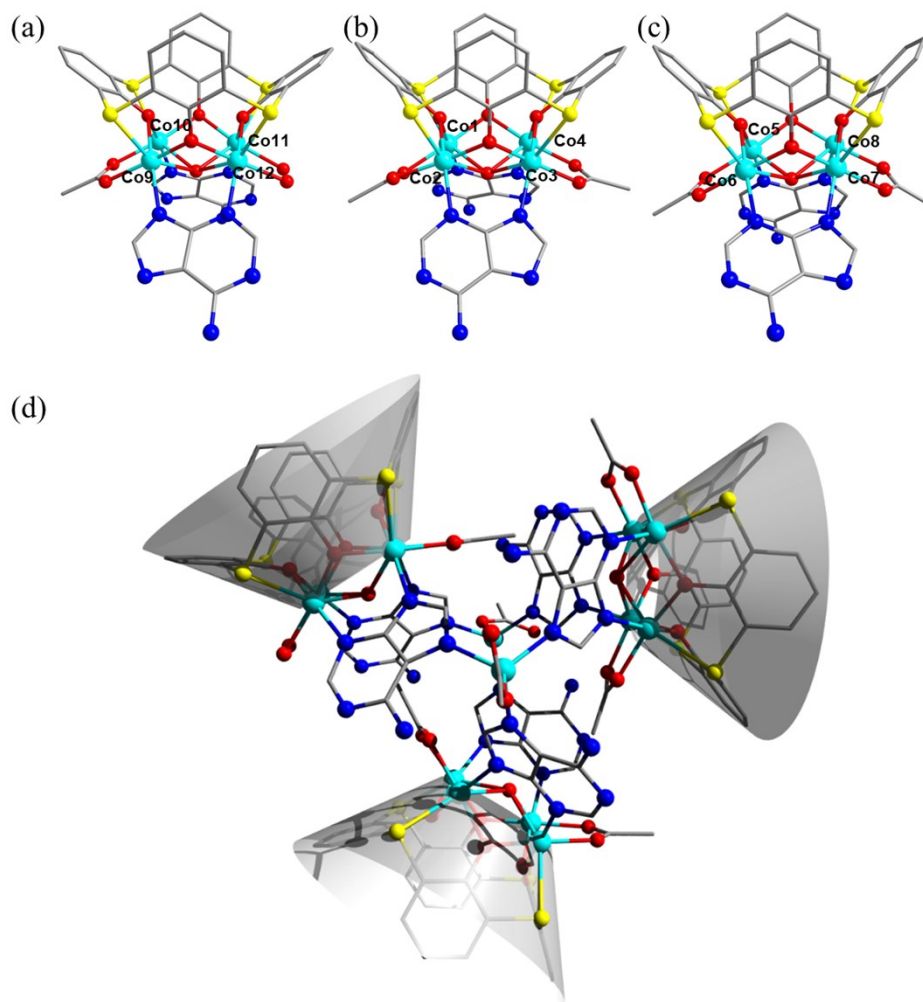

**Figure S4.** (a,b,c) Three adenine-functionalized  $\text{Co}_4$ -T4A SBUs and (d) the crystal structure of  $\text{Co}_{14}\gamma$ .

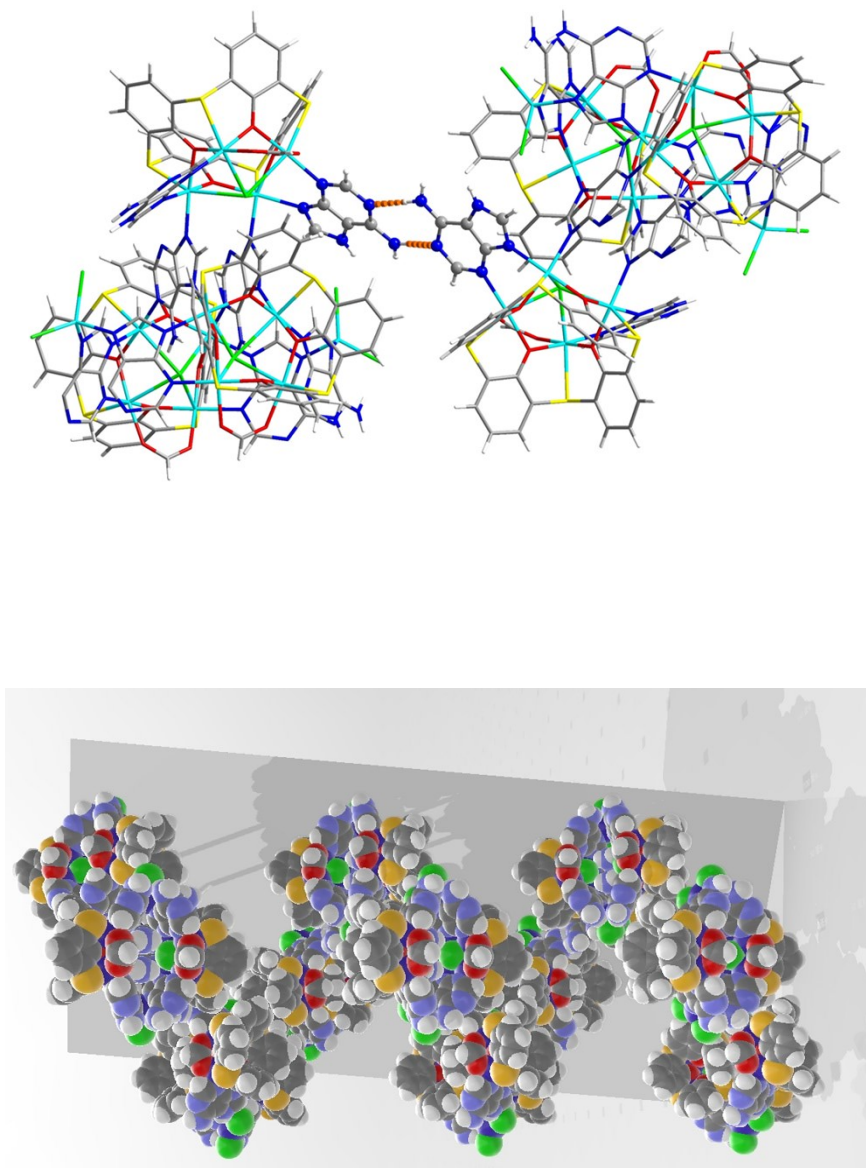

**Figure S5.** The intermolecular hydrogen bonds N-H...N (up) and right-hand helical chain along *c* axis (down) in  $\text{Co}_{14}\alpha$

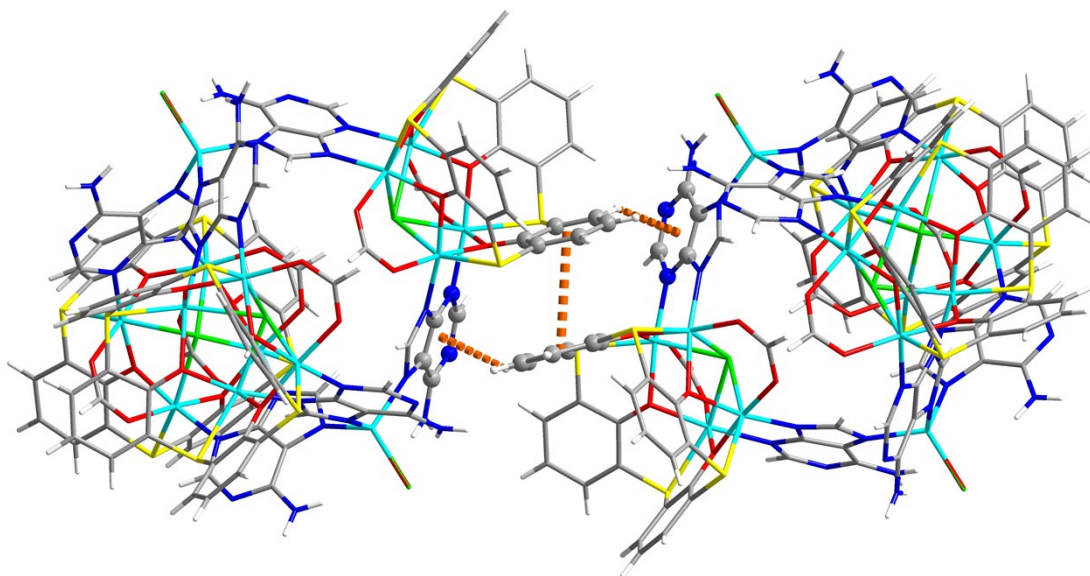

**Figure S6.** The intercluster CH... $\pi$  and face-to-face  $\pi$ ... $\pi$  interactions in **Co<sub>14</sub> $\beta$** .

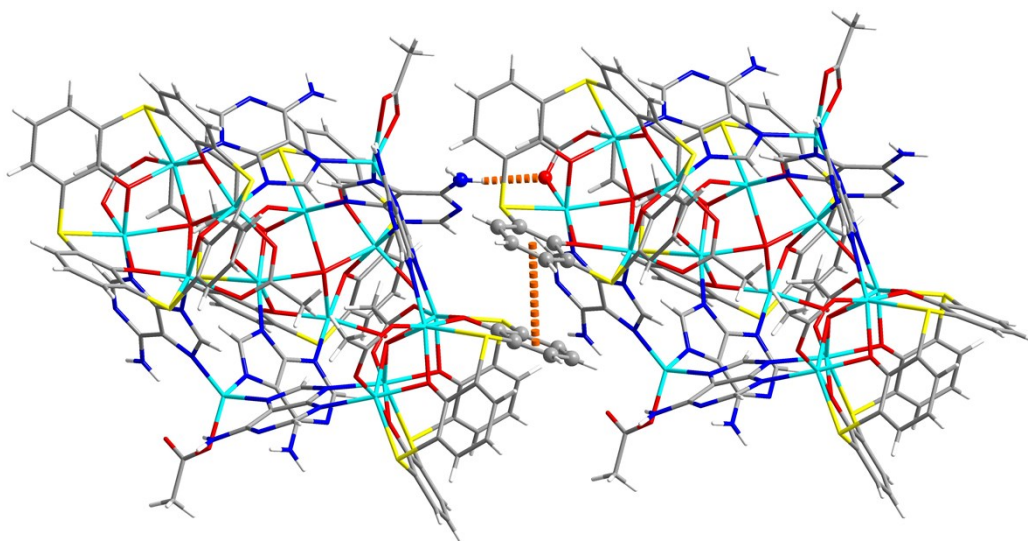

**Figure S7.** The intermolecular hydrogen bond N-H...O and face-to-face  $\pi$ ... $\pi$  interactions in **Co<sub>14</sub> $\gamma$** .

## **PXRD measurements**

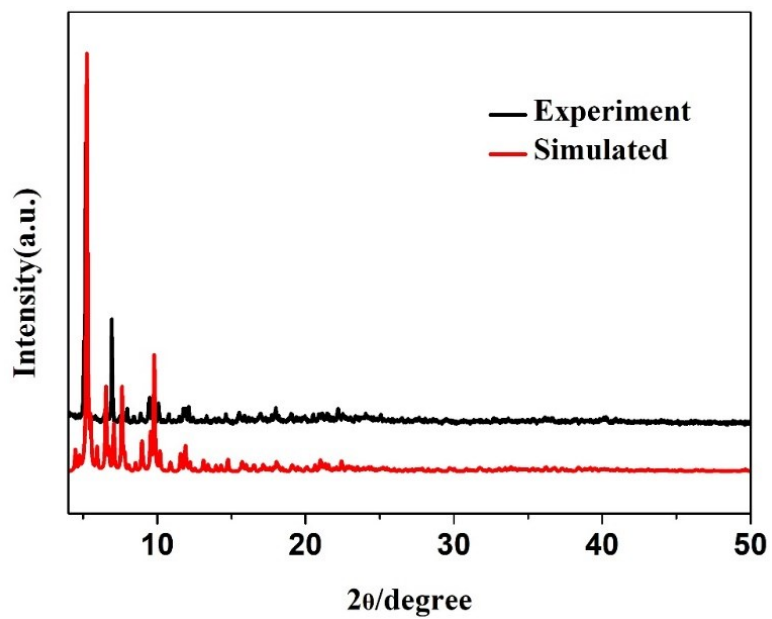

Figure S8. PXRD of the compound  $\text{Co}_{14}\alpha$ .

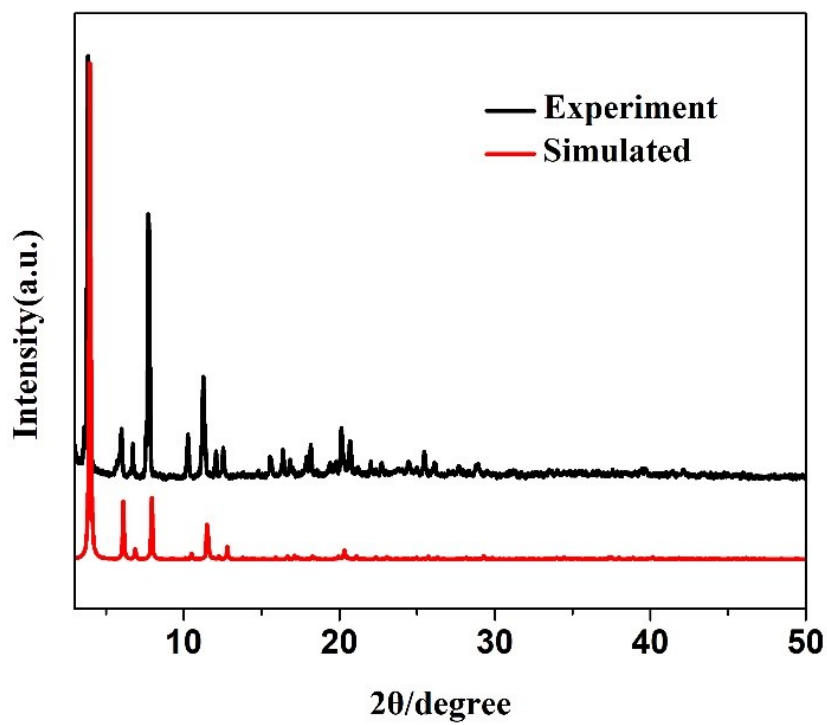

Figure S9. PXRD of compound  $\text{Co}_{14}\beta$ .

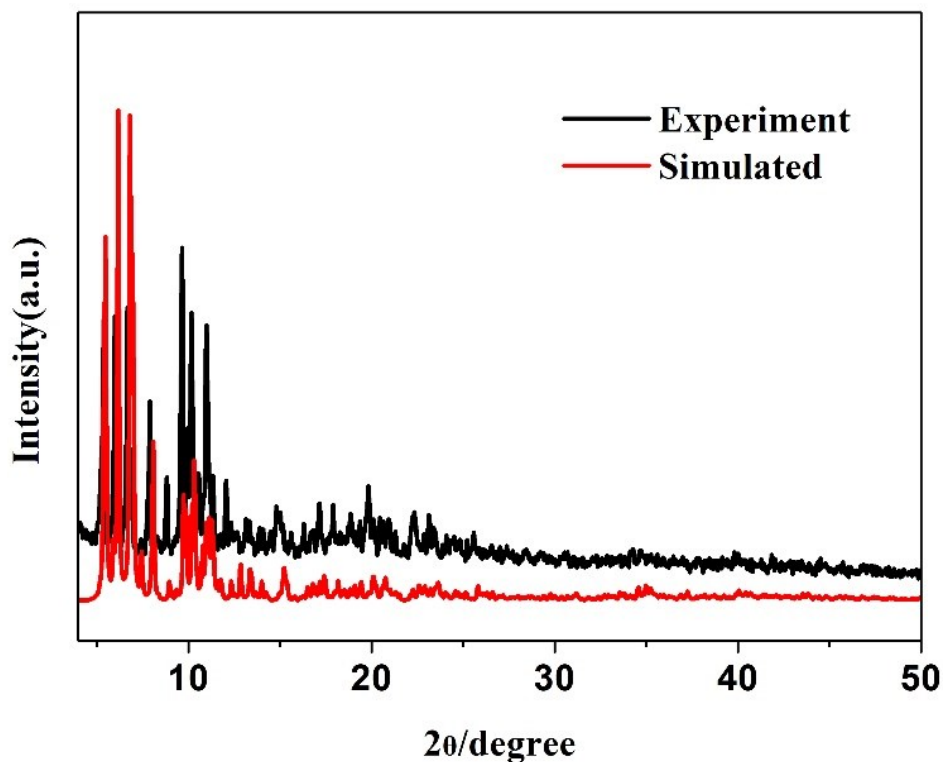

**Figure S10.** PXRD of compound  $\text{Co}_{14}\gamma$ .

The experimental PXRD patterns of the three compounds are consistent with the simulation results derived from the single crystal X-ray data, confirming the phase purity of the samples.

## TGA experiments

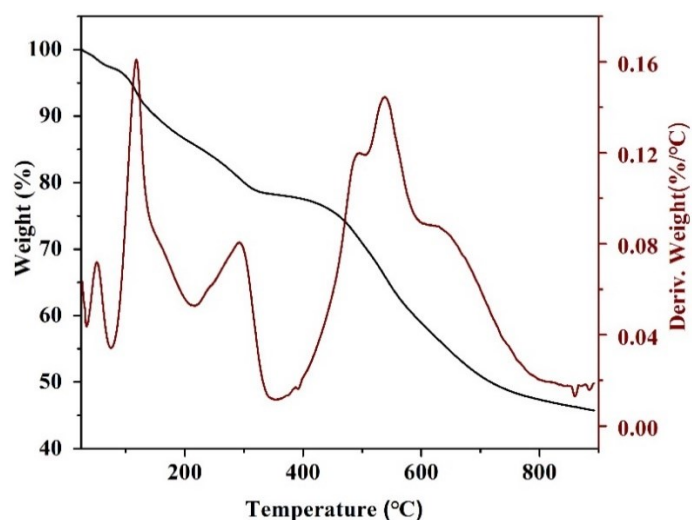

**Figure S11.** The TGA curves of  $\text{Co}_{14}\alpha$  recorded in high pure  $\text{N}_2$  (99.999%) at 20 mL/min with heating rate of 10  $^{\circ}\text{C}$  /min.

In the TGA plot of  $\text{Co}_{14}\alpha$ , the weight loss is ca. 20% from the beginning to 300  $^{\circ}\text{C}$  corresponding to loss solvent molecules in the lattice and weakly coordinated molecules (eg.  $\text{CH}_3\text{OH}$ ,  $\text{H}_2\text{O}$ , DMF).

From 300 °C to 450 °C, the weight decreases slowly. Further weight loss decreases sharply which can be assigned to the decompose of thiacalix[4]arene and adenine ligands. After 800 °C, the TGA map reached a relatively slow weight loss area. Finally, a dark black deposition product was observed at 900 °C.

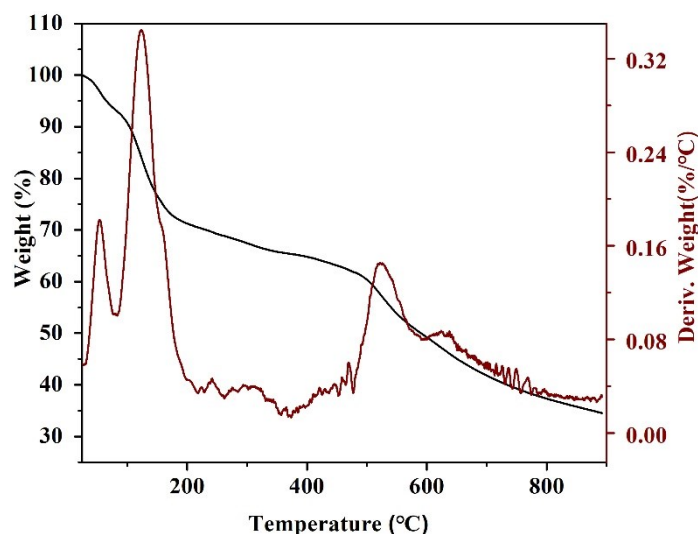

**Figure S12.** The TGA curves of **Co<sub>14</sub>β** recorded in high pure N<sub>2</sub> (99.999%) at 20 mL/min with heating rate of 10 °C /min.

In the TGA plot of **Co<sub>14</sub>β**, the weight loss is ca. 30% from the beginning to 200 °C corresponding to loss solvent molecules in the lattice and weakly coordinated molecules (eg. CH<sub>3</sub>OH, H<sub>2</sub>O, DMF). From 200 °C to 500 °C, the weight decreases slowly. Further weight loss decreases sharply which can be assigned to the decompose of thiacalix[4]arene and adenine ligands. After 800 °C, the TGA map reached a relatively slow weight loss area. Finally, a dark black deposition product was observed at 900 °C.

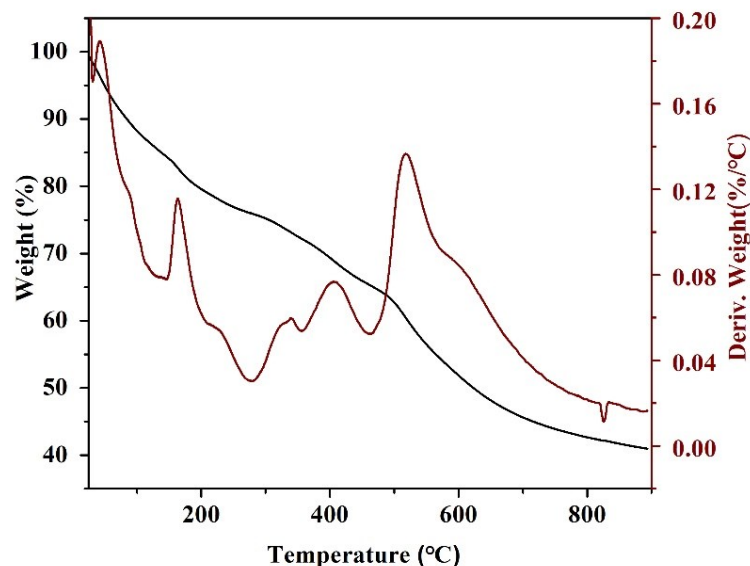

**Figure S13.** The TGA curves of **Co<sub>14</sub>γ** recorded in high pure N<sub>2</sub> (99.999%) at 20 mL/min with heating rate of 10 °C /min.

In the TGA plot of **Co<sub>14</sub>γ**, the weight loss is ca. 20% from the beginning to 200 °C corresponding to loss solvent molecules in the lattice and weakly coordinated molecules (eg. CH<sub>3</sub>OH, H<sub>2</sub>O, DMF). From 300 °C to 500 °C, the weight decreases slowly. Further weight loss decreases sharply which

can be assigned to the decompose of thiacalix[4]arene and adenine ligands. After 800 °C, the TGA map reached a relatively slow weight loss area. Finally, a dark black deposition product was observed at 900 °C.

## FTIR spectra

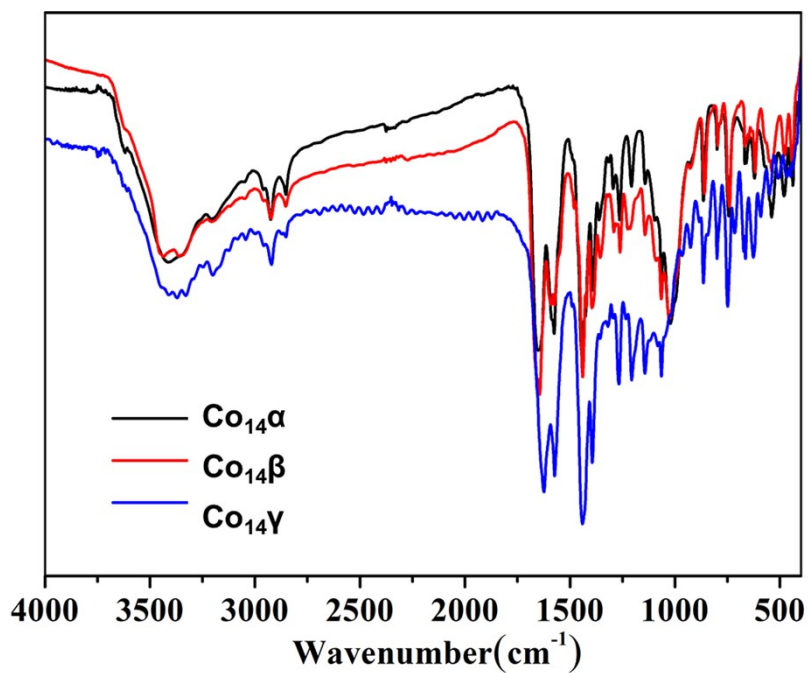

**Figure S14.** FTIR spectra of  $\text{Co}_{14}\alpha$ ,  $\text{Co}_{14}\beta$  and  $\text{Co}_{14}\gamma$ ,  $\nu_s(-\text{NH}) = 3618\text{cm}^{-1}$ ,  $\nu_{\text{as}}(-\text{NH}) = 3411\text{cm}^{-1}$ ,  $\nu(-\text{C}=\text{C})$  &  $\nu(-\text{C}=\text{N}) = 1650\text{cm}^{-1}$ ,  $1445\text{cm}^{-1}$ .

## Solid-state UV-vis light absorption

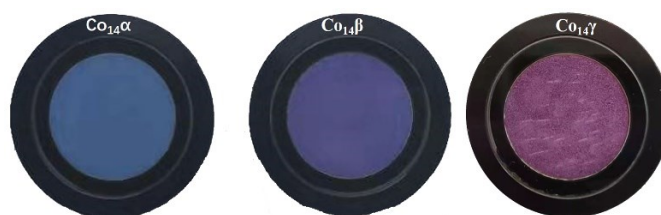



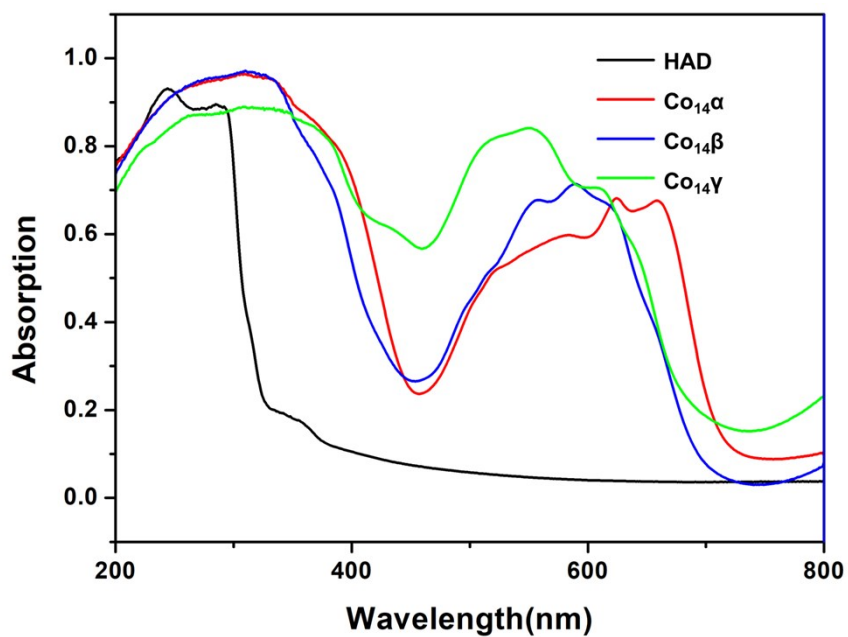

**Figure S15.** The photos pictures (up) and solid-state UV-vis absorption for  $\text{Co}_{14}\alpha$ ,  $\text{Co}_{14}\beta$  and  $\text{Co}_{14}\gamma$  (HAD supplied for comparison).

**Table S1.** Selected bond distances ( $\text{\AA}$ ) and BVS calculations for  $\text{Co}_4$ ,  $\text{Co}_{14}\alpha$ ,  $\text{Co}_{14}\beta$  and  $\text{Co}_{14}\gamma$

| $\text{Co}_4$ |            |      |       |            |          |      |       |
|---------------|------------|------|-------|------------|----------|------|-------|
| Band          | Distance   | r    | Valu  | Band       | Distance | r    | Value |
| Co(1)-O(1)    | 2.0029(19) | 1.69 | 0.432 | Co(3)-O(3) | 2.024(6) | 1.69 | 0.449 |
| Co(1)-O(6)    | 2.022(2)   | 1.69 | 0.410 | Co(3)-O(2) | 2.037(6) | 1.69 | 0.410 |
| Co(1)-O(4)    | 2.048(2)   | 1.69 | 0.382 | Co(3)-O(8) | 2.114(7) | 1.69 | 0.408 |
| Co(1)-N(1)    | 2.069(2)   | 1.84 | 0.539 | Co(3)-N(6) | 2.127(8) | 1.84 | 0.474 |
| Co(1)-S(1)    | 2.5401(9)  | 2.06 | 0.273 | Co(3)-S(3) | 2.514(3) | 2.06 | 0.280 |

|                         |            |      |              |              |           |      |              |
|-------------------------|------------|------|--------------|--------------|-----------|------|--------------|
| Co(1)-Cl(1)             | 2.6660(9)  | 2.01 | 0.170        | Co(3)-Cl(1)  | 2.684(3)  | 2.01 | 0.204        |
| valence                 |            |      | <b>2.205</b> | valence      |           |      | <b>2.225</b> |
| Co(2)-O(1)              | 1.9886(19) | 1.69 | 0.449        | Co(4)-O(3)   | 2.002(2)  | 1.69 | 0.433        |
| Co(2)-O(2)              | 2.025(2)   | 1.69 | 0.407        | Co(4)-O(4)   | 2.010(2)  | 1.69 | 0.423        |
| Co(2)-O(7)              | 2.054(2)   | 1.69 | 0.376        | Co(4)-O(5)   | 2.027(2)  | 1.69 | 0.404        |
| Co(2)-N(2)              | 2.075(2)   | 1.84 | 0.530        | Co(4)-N(7)   | 2.116(2)  | 1.84 | 0.474        |
| Co(2)-S(2)              | 2.5417(9)  | 2.06 | 0.272        | Co(4)-S(4)   | 2.5605(9) | 2.06 | 0.259        |
| Co(2)-Cl(1)             | 2.6419(8)  | 2.01 | 0.181        | Co(4)-Cl(1)  | 2.6304(8) | 2.01 | 0.187        |
| valence                 |            |      | <b>2.214</b> | valence      |           |      | <b>2.180</b> |
| <b>Co<sub>14</sub>a</b> |            |      |              |              |           |      |              |
| Band                    | Distance   | r    | Valu         | Band         | Distance  | r    | Value        |
| Co(1)-O(4)              | 2.015(5)   | 1.69 | 0.418        | Co(8)-O(8)   | 2.032(5)  | 1.69 | 0.399        |
| Co(1)-O(1)              | 2.016(5)   | 1.69 | 0.417        | Co(8)-O(7)   | 2.031(4)  | 1.69 | 0.400        |
| Co(1)-N(1)              | 2.032(7)   | 1.84 | 0.595        | Co(8)-N(7)   | 2.112(6)  | 1.84 | 0.479        |
| Co(1)-N(11)             | 2.123(6)   | 1.84 | 0.465        | Co(8)-N(26)  | 2.130(6)  | 1.84 | 0.457        |
| Co(1)-S(1)              | 2.460(2)   | 2.06 | 0.339        | Co(8)-S(8)   | 2.513(2)  | 2.06 | 0.294        |
|                         |            |      |              | Co(8)-Cl(2)  | 2.683(2)  | 2.01 | 0.162        |
| valence                 |            |      | <b>2.234</b> | valence      |           |      | <b>2.191</b> |
| Co(2)-O(1)              | 2.012(5)   | 1.69 | 0.421        | Co(9)-O(9)   | 2.020(5)  | 1.69 | 0.412        |
| Co(2)-O(2)              | 2.015(5)   | 1.69 | 0.418        | Co(9)-O(12)  | 2.037(5)  | 1.69 | 0.394        |
| Co(2)-N(6)              | 2.083(7)   | 1.84 | 0.519        | Co(9)-N(31)  | 2.093(7)  | 1.84 | 0.505        |
| Co(2)-N(16)             | 2.162(7)   | 1.84 | 0.419        | Co(9)-N(4)   | 2.117(7)  | 1.84 | 0.473        |
| Co(2)-S(2)              | 2.470(2)   | 2.06 | 0.330        | Co(9)-S(9)   | 2.518(2)  | 2.06 | 0.290        |
| Co(2)-Cl(1)             | 2.729(2)   | 2.01 | 0.143        | Co(9)-Cl(3)  | 2.695(2)  | 2.01 | 0.157        |
| valence                 |            |      | <b>2.250</b> | valence      |           |      | <b>2.230</b> |
| Co(3)-O(3)              | 1.997(5)   | 1.69 | 0.439        | Co(10)-O(9)  | 2.020(5)  | 1.69 | 0.412        |
| Co(3)-O(2)              | 2.001(5)   | 1.69 | 0.434        | Co(10)-O(10) | 2.029(6)  | 1.69 | 0.402        |
| Co(3)-O(14)             | 2.037(6)   | 1.69 | 0.394        | Co(10)-N(36) | 2.103(7)  | 1.84 | 0.491        |
| Co(3)-N(18)             | 2.097(7)   | 1.84 | 0.499        | Co(10)-N(9)  | 2.131(7)  | 1.84 | 0.455        |
| Co(3)-S(3)              | 2.545(2)   | 2.06 | 0.270        | Co(10)-S(12) | 2.500(2)  | 2.06 | 0.304        |
| Co(3)-Cl(1)             | 2.625(2)   | 2.01 | 0.190        | Co(10)-Cl(3) | 2.673(2)  | 2.01 | 0.167        |
| valence                 |            |      | <b>2.225</b> | valence      |           |      | <b>2.232</b> |
| Co(4)-O(3)              | 1.988(5)   | 1.69 | 0.449        | Co(11)-O(10) | 1.995(6)  | 1.69 | 0.441        |
| Co(4)-O(4)              | 2.014(5)   | 1.69 | 0.419        | Co(11)-O(11) | 2.013(6)  | 1.69 | 0.420        |
| Co(4)-O(13)             | 2.037(5)   | 1.69 | 0.394        | Co(11)-O(17) | 2.033(7)  | 1.69 | 0.398        |
| Co(4)-N(13)             | 2.090(6)   | 1.84 | 0.509        | Co(11)-N(38) | 2.098(8)  | 1.84 | 0.498        |
| Co(4)-S(4)              | 2.517(2)   | 2.06 | 0.291        | Co(11)-S(11) | 2.499(3)  | 2.06 | 0.305        |
| Co(4)-Cl(1)             | 2.604(2)   | 2.01 | 0.201        | Co(11)-Cl(3) | 2.734(3)  | 2.01 | 0.141        |
| valence                 |            |      | <b>2.262</b> | valence      |           |      | <b>2.203</b> |
| Co(5)-O(8)              | 2.016(5)   | 1.69 | 0.417        | Co(12)-O(11) | 1.986(6)  | 1.69 | 0.452        |
| Co(5)-O(5)              | 2.043(5)   | 1.69 | 0.387        | Co(12)-O(12) | 2.016(6)  | 1.69 | 0.417        |
| Co(5)-N(21)             | 2.078(6)   | 1.84 | 0.526        | Co(12)-O(18) | 2.046(8)  | 1.69 | 0.384        |
| Co(5)-N(2)              | 2.112(6)   | 1.84 | 0.479        | Co(12)-N(33) | 2.077(8)  | 1.84 | 0.527        |
| Co(5)-S(5)              | 2.520(2)   | 2.06 | 0.288        | Co(12)-S(10) | 2.494(3)  | 2.06 | 0.309        |
| Co(5)-Cl(2)             | 2.649(2)   | 2.01 | 0.178        | Co(12)-Cl(3) | 2.704(2)  | 2.01 | 0.153        |
| valence                 |            |      | <b>2.275</b> | valence      |           |      | <b>2.242</b> |

|                         |            |      |              |              |          |      |              |
|-------------------------|------------|------|--------------|--------------|----------|------|--------------|
| Co(6)-O(6)              | 1.972(5)   | 1.69 | 0.469        | Co(13)-N(27) | 1.987(6) | 1.84 | 0.672        |
| Co(6)-O(5)              | 2.008(5)   | 1.69 | 0.426        | Co(13)-N(37) | 2.023(8) | 1.84 | 0.610        |
| Co(6)-O(16)             | 2.061(6)   | 1.69 | 0.369        | Co(13)-Cl(4) | 2.256(2) | 2.01 | 0.514        |
| Co(6)-N(23)             | 2.055(7)   | 1.84 | 0.559        | Co(13)-Cl(5) | 2.267(3) | 2.01 | 0.499        |
| Co(6)-S(6)              | 2.495(2)   | 2.06 | 0.309        |              |          |      |              |
| valence                 |            |      | <b>2.132</b> | valence      |          |      | <b>2.296</b> |
| Band                    | Distance   | r    | Valu         | Band         | Distance | r    | Value        |
| Co(7)-O(6)              | 1.964(5)   | 1.69 | 0.479        | Co(14)-N(32) | 2.028(8) | 1.84 | 0.602        |
| Co(7)-O(7)              | 2.002(5)   | 1.69 | 0.433        | Co(14)-N(22) | 2.025(7) | 1.84 | 0.607        |
| Co(7)-O(15)             | 2.060(6)   | 1.69 | 0.370        | Co(14)-Cl(7) | 2.244(3) | 2.01 | 0.531        |
| Co(7)-N(28)             | 2.070(6)   | 1.84 | 0.537        | Co(14)-Cl(6) | 2.250(3) | 2.01 | 0.523        |
| Co(7)-S(7)              | 2.485(2)   | 2.06 | 0.317        |              |          |      |              |
| Co(7)-Cl(2)             | 2.715(2)   | 2.01 | 0.149        |              |          |      |              |
| valence                 |            |      | <b>2.285</b> | valence      |          |      | <b>2.262</b> |
| <b>Co<sub>14</sub>β</b> |            |      |              |              |          |      |              |
| Band                    | Distance   | r    | Valu         | Band         | Distance | r    | Value        |
| Co(1)-O(2)              | 1.974(6)   | 1.69 | 0.467        | Co(3)-N(2)   | 1.992(6) | 1.84 | 0.663        |
| Co(1)-O(4)              | 2.025(7)   | 1.69 | 0.407        | Co(3)-N(2)   | 1.992(6) | 1.84 | 0.663        |
| Co(1)-O(1)              | 2.031(6)   | 1.69 | 0.400        | Co(3)-N(2)   | 1.992(6) | 1.84 | 0.663        |
| Co(1)-N(4)              | 2.087(7)   | 1.84 | 0.513        | Co(3)-O(6)   | 2.20(13) | 1.69 | 0.253        |
| Co(1)-S(1)              | 2.516(3)   | 2.06 | 0.292        | Co(3)-Cl(2)  | 2.22(5)  | 2.01 | 0.567        |
| Co(1)-Cl(1)             | 2.585(2)   | 2.01 | 0.211        |              |          |      |              |
| valence                 |            |      | <b>2.289</b> | valence      |          |      | <b>2.810</b> |
| Co(2)-O(2)              | 2.003(6)   | 1.69 | 0.431        |              |          |      |              |
| Co(2)-O(5)              | 2.017(6)   | 1.69 | 0.415        |              |          |      |              |
| Co(2)-O(3)              | 2.048(6)   | 1.69 | 0.382        |              |          |      |              |
| Co(2)-N(1)              | 2.075(6)   | 1.84 | 0.530        |              |          |      |              |
| Co(2)-S(2)              | 2.543(2)   | 2.06 | 0.271        |              |          |      |              |
| Co(2)-Cl(1)             | 2.633(3)   | 2.01 | 0.186        |              |          |      |              |
| valence                 |            |      | <b>2.216</b> | valence      |          |      |              |
| <b>Co<sub>14</sub>γ</b> |            |      |              |              |          |      |              |
| Band                    | Distance   | r    | Valu         | Band         | Distance | r    | Value        |
| Co(1)-O(4)              | 1.981(4)   | 1.69 | 0.458        | Co(8)-O(8)   | 1.986(4) | 1.69 | 0.452        |
| Co(1)-O(1)              | 2.041(4)   | 1.69 | 0.389        | Co(8)-O(20)  | 2.040(5) | 1.69 | 0.390        |
| Co(1)-O(13)             | 2.064(4)   | 1.69 | 0.366        | Co(8)-S(8)   | 2.573(2) | 2.06 | 0.250        |
| Co(1)-N(1)              | 2.121(5)   | 1.84 | 0.468        | Co(8)-O(7)   | 2.018(4) | 1.69 | 0.414        |
| Co(1)-O(29)             | 2.262(4)   | 1.69 | 0.214        | Co(8)-N(12)  | 2.074(5) | 1.84 | 0.531        |
| Co(1)-S(1)              | 2.5762(18) | 2.06 | 0.248        |              |          |      |              |
| valence                 |            |      | <b>2.143</b> | valence      |          |      | <b>2.038</b> |
| Co(2)-O(2)              | 1.991(4)   | 1.69 | 0.446        | Co(9)-O(12)  | 1.995(5) | 1.69 | 0.441        |
| Co(2)-O(1)              | 2.018(4)   | 1.69 | 0.414        | Co(9)-O(21)  | 2.054(5) | 1.69 | 0.376        |
| Co(2)-O(14)             | 2.072(4)   | 1.69 | 0.358        | Co(9)-O(31)  | 2.283(4) | 1.69 | 0.202        |
| Co(2)-N(6)              | 2.102(5)   | 1.84 | 0.493        | Co(9)-O(9)   | 2.044(4) | 1.69 | 0.386        |
| Co(2)-S(2)              | 2.5758(18) | 2.06 | 0.248        | Co(9)-N(21)  | 2.077(5) | 1.84 | 0.527        |
|                         |            |      |              | Co(9)-S(9)   | 2.626(2) | 2.06 | 0.217        |
| valence                 |            |      | <b>1.959</b> | valence      |          |      | <b>2.149</b> |

|             |            |      |       |              |          |      |       |
|-------------|------------|------|-------|--------------|----------|------|-------|
| Co(3)-O(2)  | 1.994(4)   | 1.69 | 0.442 | Co(10)-O(10) | 1.992(5) | 1.69 | 0.444 |
| Co(3)-O(15) | 2.037(5)   | 1.69 | 0.394 | Co(10)-O(9)  | 2.040(5) | 1.69 | 0.390 |
| Co(3)-O(3)  | 2.047(4)   | 1.69 | 0.383 | Co(10)-O(31) | 2.358(5) | 1.69 | 0.165 |
| Co(3)-O(29) | 2.322(7)   | 1.69 | 0.182 | Co(10)-O(22) | 2.030(5) | 1.69 | 0.401 |
| Co(3)-N(9)  | 2.106(5)   | 1.84 | 0.487 | Co(10)-N(26) | 2.099(6) | 1.84 | 0.497 |
| Co(3)-S(3)  | 2.6175(19) | 2.06 | 0.222 | Co(10)-S(10) | 2.612(2) | 2.06 | 0.225 |
| valence     |            |      | 2.107 | valence      |          |      | 2.123 |
| Co(4)-O(3)  | 2.009(4)   | 1.69 | 0.425 | Co(11)-O(10) | 1.995(5) | 1.69 | 0.441 |
| Co(4)-O(4)  | 1.978(4)   | 1.69 | 0.462 | Co(11)-O(23) | 2.128(8) | 1.69 | 0.308 |
| Co(4)-O(16) | 2.027(4)   | 1.69 | 0.404 | Co(11)-O(31) | 2.240(4) | 1.69 | 0.227 |
| Co(4)-O(29) | 2.367(4)   | 1.69 | 0.161 | Co(11)-O(11) | 2.044(5) | 1.69 | 0.386 |
| Co(4)-N(2)  | 2.057(5)   | 1.84 | 0.556 | Co(11)-N(27) | 2.148(6) | 1.84 | 0.435 |
| Co(4)-S(4)  | 2.6215(19) | 2.06 | 0.219 | Co(11)-S(11) | 2.616(2) | 2.06 | 0.223 |
| valence     |            |      | 2.227 | valence      |          |      | 2.020 |
| Co(5)-O(8)  | 1.999(4)   | 1.69 | 0.436 | Co(12)-O(12) | 1.981(5) | 1.69 | 0.458 |
| Co(5)-O(17) | 2.059(5)   | 1.69 | 0.371 | Co(12)-O(24) | 2.090(7) | 1.69 | 0.341 |
| Co(5)-O(30) | 2.257(4)   | 1.69 | 0.217 | Co(12)-S(12) | 2.569(2) | 2.06 | 0.253 |
| Co(5)-O(5)  | 2.032(4)   | 1.69 | 0.399 | Co(12)-O(11) | 2.035(5) | 1.69 | 0.396 |
| Co(5)-N(11) | 2.120(5)   | 1.84 | 0.469 | Co(12)-N(24) | 2.118(6) | 1.84 | 0.472 |
| Co(5)-S(5)  | 2.6300(19) | 2.06 | 0.214 |              |          |      |       |
| valence     |            |      | 2.107 | valence      |          |      | 1.919 |
| Co(6)-O(6)  | 1.985(5)   | 1.69 | 0.453 | Co(13)-O(25) | 1.935(5) | 1.69 | 0.519 |
| Co(6)-O(5)  | 2.017(4)   | 1.69 | 0.415 | Co(13)-N(8)  | 1.992(5) | 1.84 | 0.663 |
| Co(6)-O(30) | 2.363(4)   | 1.69 | 0.163 | Co(13)-N(29) | 2.021(5) | 1.84 | 0.613 |
| Co(6)-O(18) | 2.013(5)   | 1.69 | 0.420 | Co(13)-N(18) | 2.008(5) | 1.84 | 0.635 |
| Co(6)-N(16) | 2.094(5)   | 1.84 | 0.503 |              |          |      |       |
| Co(6)-S(6)  | 2.5736(19) | 2.06 | 0.250 |              |          |      |       |
| valence     |            |      | 2.204 | valence      |          |      | 2.430 |
| Co(7)-O(6)  | 1.987(4)   | 1.69 | 0.451 | Co(14)-O(27) | 1.941(6) | 1.69 | 0.510 |
| Co(7)-O(19) | 2.043(5)   | 1.69 | 0.387 | Co(14)-N(3)  | 2.008(5) | 1.84 | 0.635 |
| Co(7)-O(30) | 2.253(4)   | 1.69 | 0.220 | Co(14)-N(22) | 2.011(5) | 1.84 | 0.630 |
| Co(7)-O(7)  | 2.012(4)   | 1.69 | 0.421 | Co(14)-N(13) | 2.008(5) | 1.84 | 0.635 |
| Co(7)-N(19) | 2.083(5)   | 1.84 | 0.519 |              |          |      |       |
| Co(7)-S(7)  | 2.637(2)   | 2.06 | 0.210 |              |          |      |       |
| valence     |            |      | 2.207 | valence      |          |      | 2.410 |

BVS calculations reveal that all the cobalt atoms in these four metal clusters are divalent.
